# Supplementary material for: Second-line cabozantinib after sorafenib treatment for advanced hepatocellular carcinoma: a subgroup analysis of the phase 3 CELESTIAL trial
Source: PubMed Central journal article supplement — ESMO Open. 2020 Aug 26;5(4):e000714. doi: 10.1136/esmoopen-2020-000714 (PMC7451459; doi:10.1136/esmoopen-2020-000714), 2020-08-26
Supplement: esmoopen-2020-000714supp001.pdf [file esmoopen-2020-000714supp001.pdf]

## Supplement

**Table S1: Best Overall Tumor Response in Patients Who Received Prior Sorafenib**

|                                     | <b>Cabozantinib<br/>(N=331)</b> | <b>Placebo<br/>(N=164)</b> |
|-------------------------------------|---------------------------------|----------------------------|
| <b>ORR* (95% CI), n (%)</b>         | 16 (5)<br>(2.8–7.7)             | 1 (0.6)<br>(0–3.4)         |
| <b>Best overall response, n (%)</b> |                                 |                            |
| Partial response                    | 16 (5)                          | 1 (0.6)                    |
| Stable disease                      | 206 (62)                        | 50 (30)                    |
| Progressive disease                 | 62 (19)                         | 91 (55)                    |
| Not evaluable/missing               | 47 (14)                         | 22 (13)                    |

\*All responses were partial responses.

CI, confidence interval; ORR, overall response rate.

**Table S2: Survival From the Start of Prior Sorafenib**

|                                     | <b>Duration of Prior Sorafenib*</b> |                           |                                |                           |                                 |                           |
|-------------------------------------|-------------------------------------|---------------------------|--------------------------------|---------------------------|---------------------------------|---------------------------|
|                                     | <b>&lt;3 Months</b>                 |                           | <b>3 to &lt;6 Months</b>       |                           | <b>≥6 Months</b>                |                           |
|                                     | <b>Cabozantinib<br/>(N=89)</b>      | <b>Placebo<br/>(N=47)</b> | <b>Cabozantinib<br/>(N=98)</b> | <b>Placebo<br/>(N=43)</b> | <b>Cabozantinib<br/>(N=143)</b> | <b>Placebo<br/>(N=74)</b> |
| <b>Median survival, mo (95% CI)</b> | 13.3<br>(11.5–19.0)                 | 10.4<br>(8.5–14.7)        | 21.2<br>(15.6–26.1)            | 14.1<br>(10.2–20.0)       | 29.9<br>(25.9–32.6)             | 25.8<br>(22.3–33.0)       |

\*Patients who received prior sorafenib as the only prior systemic therapy for hepatocellular carcinoma.

**Table S3: Subsequent Anticancer Therapy**

|                                    | Duration of Prior Sorafenib* |                   |                        |                   |                         |                   |
|------------------------------------|------------------------------|-------------------|------------------------|-------------------|-------------------------|-------------------|
|                                    | <3 Months                    |                   | 3 to <6 Months         |                   | ≥6 Months               |                   |
|                                    | Cabozantinib<br>(N=89)       | Placebo<br>(N=47) | Cabozantinib<br>(N=98) | Placebo<br>(N=43) | Cabozantinib<br>(N=143) | Placebo<br>(N=74) |
| <b>Any systemic therapy, n (%)</b> | 28 (31)                      | 17 (36)           | 23 (23)                | 13 (30)           | 30 (21)                 | 17 (23)           |
| Sorafenib                          | 1 (1)                        | 2 (4)             | 5 (5)                  | 2 (5)             | 11 (8)                  | 0                 |
| Regorafenib                        | 2 (2)                        | 0                 | 2 (2)                  | 1 (2)             | 4 (3)                   | 1 (1)             |
| Anti-PD-1/PD-L1                    | 5 (6)                        | 4 (9)             | 5 (5)                  | 3 (7)             | 3 (2)                   | 3 (4)             |
| Cytotoxic chemotherapy             | 16 (18)                      | 9 (19)            | 11 (11)                | 8 (19)            | 14 (10)                 | 9 (12)            |
| Investigational agents             | 4 (4)                        | 3 (6)             | 6 (6)                  | 3 (7)             | 6 (4)                   | 4 (5)             |

\*Patients who received prior sorafenib as the only prior systemic therapy for hepatocellular carcinoma.

PD-1, programmed cell death-1; PD-L1, programmed death-ligand 1.

**Table S4: Study Treatment Exposure and Discontinuations**

|                                                                      | Duration of Prior Sorafenib* |                   |                        |                   |                         |                   |
|----------------------------------------------------------------------|------------------------------|-------------------|------------------------|-------------------|-------------------------|-------------------|
|                                                                      | <3 Months                    |                   | 3 to <6 Months         |                   | ≥6 Months               |                   |
|                                                                      | Cabozantinib<br>(N=88)       | Placebo<br>(N=47) | Cabozantinib<br>(N=97) | Placebo<br>(N=43) | Cabozantinib<br>(N=143) | Placebo<br>(N=74) |
| <b>Duration of exposure, median (range), months</b>                  | 3.4<br>(0.1–26.5)            | 1.9<br>(0.4–27.2) | 3.9<br>(0.3–37.3)      | 2.1<br>(0.0–11.7) | 5.1<br>(0.3–35.3)       | 2.1<br>(0.1–22.2) |
| <b>Average daily dose, median, mg</b>                                | 35.0                         | 59.0              | 37.2                   | 58.8              | 34.7                    | 58.9              |
| <b>Dose reductions, n (%)</b>                                        | 57 (65)                      | 6 (13)            | 59 (61)                | 4 (9)             | 92 (64)                 | 7 (9)             |
| <b>Discontinuation due to treatment-related adverse event, n (%)</b> | 17 (19)                      | 2 (4)             | 13 (13)                | 0                 | 25 (17)                 | 2 (3)             |

\*Safety was assessed in all patients who received at least one dose of study treatment.
